# Supplementary material for: Isocaloric Diets with Different Protein-Carbohydrate Ratios: The Effect on Sleep, Melatonin Secretion and Subsequent Nutritional Response in Healthy Young Men
Source: MDPI journal article supplement (doi:10.3390/nu14245299), 2022-12-13
Supplement: s1 [file s1]

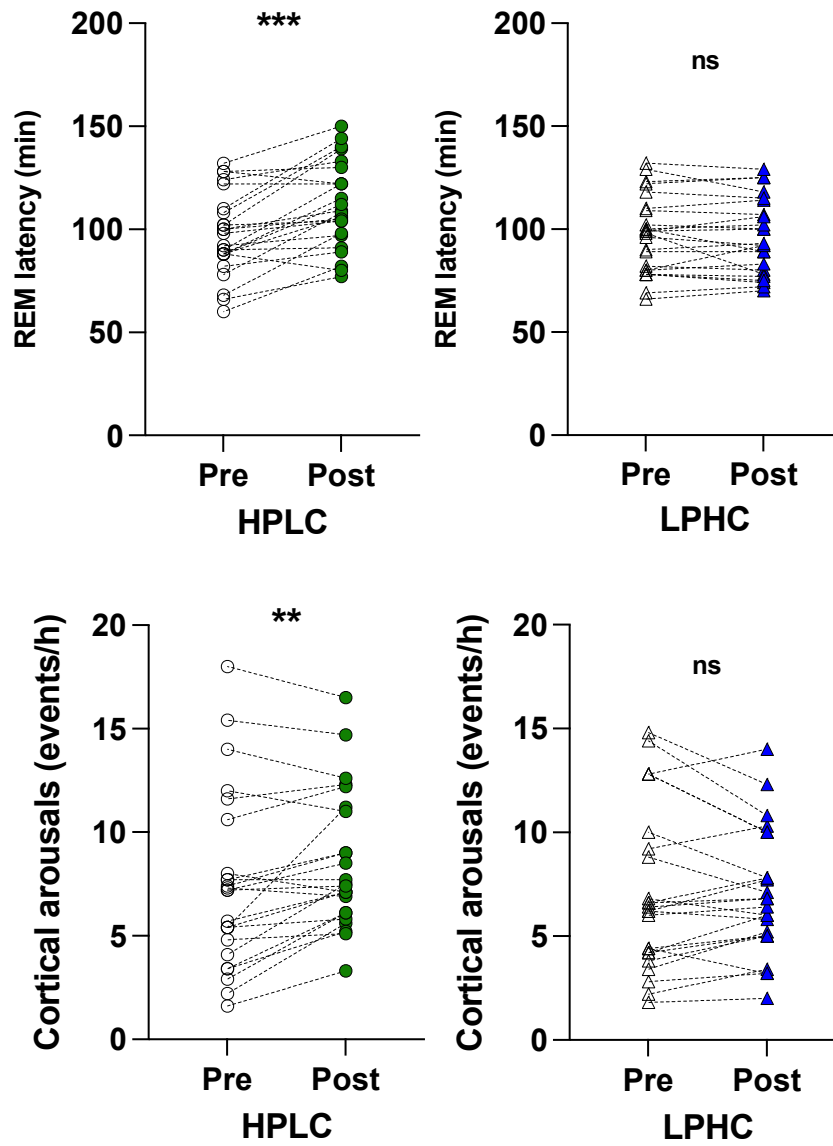

**Figure S1.** Individual response of REM latency and arousals to HPLC and LPHC diets

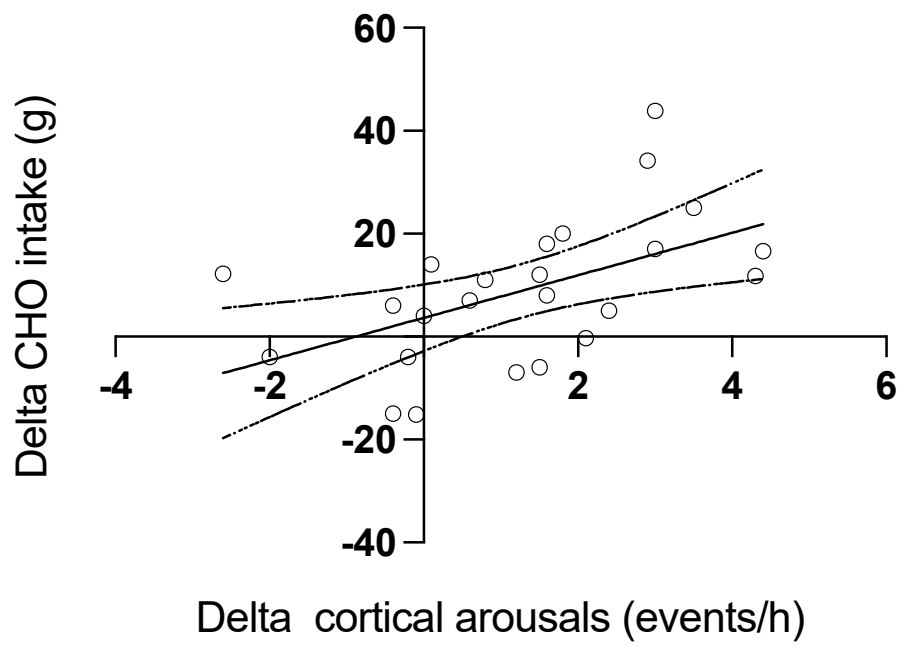

**Figure S2.** Correlation between  $\Delta$  cortical arousals and  $\Delta$  CHO  
\* ( $r=0.523$ ,  $p<0.009$ );  $\Delta$  is expressed as (HPLC-LPHC)

**Table S1.** Macronutrients content and proportions of HPLC and LPHC diets

|                               | HPLC diet | LPHC diet |
|-------------------------------|-----------|-----------|
| Energy (kcal/kg)              | 42        | 42        |
| Protein (g/kg)                | 2         | 1.1       |
| Protein (%)                   | 20        | 11        |
| Carbohydrates (g/kg)          | 4.45      | 5.35      |
| Carbohydrates (%)             | 42        | 51        |
| Fat (g/kg)                    | 1.8       | 1.8       |
| Fat (%)                       | 38        | 38        |
| Protein : Carbohydrates ratio | 0.44      | 0.20      |

HPLC: high-protein, low-carbohydrate; LPHC: low-protein, high carbohydrate

**Table S2.** Food items included in HPLC and LPHC diets

|                  | <b>Groups</b>                         | <b>Food</b>                                                  | <b>Nutritional values<br/>per 100g of food</b> |
|------------------|---------------------------------------|--------------------------------------------------------------|------------------------------------------------|
| <b>Breakfast</b> | Dairy products                        | Milk                                                         | 116 kcal                                       |
|                  |                                       | Yogurt                                                       | 78 kcal                                        |
|                  | Fruits                                | Seasonal fruit (Orange or apple or pear)                     | 67 kcal                                        |
|                  | Grain (cereal)                        | Bread                                                        | 210 kcal                                       |
|                  |                                       | Cereal grains                                                | 231 kcal                                       |
|                  | Sweet product, sugars                 | Apricot jam                                                  | 26 kcal                                        |
|                  | Lean meats and poultry                | Sliced turkey                                                | 121 kcal                                       |
| <b>Lunch</b>     | Fats                                  | Butter                                                       | 74 kcal                                        |
|                  | Vegetables and legumes (raw)          | Grated carrot                                                | 32 kcal                                        |
|                  | Fish                                  | White fish fillet                                            | 154 kcal                                       |
|                  | Grain (cereal)                        | Steamed rice                                                 | 133 kcal                                       |
|                  | Vegetables and legumes/beans (cooked) | Mixed vegetables (onion, carrot, red and yellow bell pepper) | 117 kcal                                       |
|                  | Dairy products                        | Unflavoured yoghurt                                          | 62 kcal                                        |
|                  | Sweet product, sugars                 | Applesauce                                                   | 90 kcal                                        |
|                  |                                       | Sugars (5g)                                                  | 398 kcal                                       |
|                  | Vegetables and legumes (raw)          | Coleslaw                                                     | 26 kcal                                        |
|                  | Lean meats and poultry                | Sliced turkey                                                | 121 kcal                                       |
| <b>Dinner</b>    | Grain (cereal)                        | Cooked pasta<br>bread                                        | 145 kcal<br>263 kcal                           |
|                  | Vegetables and legumes/beans (cooked) | French bean                                                  | 27 kcal                                        |
|                  | Dairy products                        | Cottage cheese                                               | 74 kcal                                        |
|                  | Fruits                                | Seasonal fruit (Orange or apple or pear)                     | 48 kcal                                        |

**Table S3.** Sedentary behaviors and physical activity during HPLC vs. LPHC diets (Day1-Day3)

|                           | HPLC              |                 |                 |                | LPHC            |                 |                 |                |
|---------------------------|-------------------|-----------------|-----------------|----------------|-----------------|-----------------|-----------------|----------------|
|                           | Mean (SD)Day<br>1 | Mean (SD) Day 2 | Mean (SD) Day 3 | p-value (ES)   | Mean (SD) Day 1 | Mean (SD) Day 2 | Mean (SD) Day 3 | p-value (ES)   |
| <b>Time spent on SED</b>  | 489.38 (35.77)    | 490.38 (29.57)  | 490.15 (31.42)  | 0.949 (<0.001) | 487.33 (19.10)  | 487.83 (18.33)  | 488.29 (29.52)  | 0.936 (<0.001) |
| <b>Time spent on LPA</b>  | 427.75 (35.12)    | 427.63 (35.28)  | 427.98 (39.85)  | 0.992 (<0.001) | 429.67 (41.59)  | 429.79 (36.99)  | 4329.96 (40.43) | 0.993 (<0.001) |
| <b>Time spent on MPA</b>  | 39 (18.44)        | 38.96 (18.37)   | 38.94 (19.86)   | 0.999 (<0.001) | 38.63 (16.82)   | 38.25 (18.15)   | 38.31 (17.60)   | 0.957 (<0.001) |
| <b>Time spent on VPA</b>  | 6.63 (3.75)       | 6.54 (4.31)     | 6.32 (4.77)     | 0.860 (<0.001) | 7.42 (4.45)     | 7.38 (4.83)     | 7.33 (5.48)     | 0.995 (<0.001) |
| <b>Time spent on MVPA</b> | 45.63 (20.97)     | 45.50 (21.34)   | 45.26 (23.20)   | 0.972 (<0.001) | 46.04 (17.64)   | 45.63 (19.17)   | 45.64 (19.48)   | 0.976 (<0.001) |

HPLC: high-protein, low-carbohydrate; LPA: light physical activity; LPHC: low-protein, high carbohydrate; MPA: moderate physical activity; MVPA: moderate to vigorous physical activity; SB: sedentary behavior; VPA: vigorous physical activity.

**Table S4.** Comparison of sleep outcomes during PRE-intervention night between HPLC and LPHC diets

|                                     | HPLC          | LPHC          | p-value (ES)  |
|-------------------------------------|---------------|---------------|---------------|
|                                     | Mean (SD)     | Mean (SD)     |               |
| <b>TST (min)</b>                    | 423 (24.00)   | 426 (24.60)   | 0.386 (0.05)  |
| <b>REM (min)</b>                    | 108 (21.60)   | 109 (22.10)   | 0.458 (0.03)  |
| <b>REM (%)</b>                      | 25.60 (4.94)  | 25.70 (5.43)  | 0.790 (0.01)  |
| <b>N1 (min)</b>                     | 30.3 (5.33)   | 29.90 (5.05)  | 0.773 (0.03)  |
| <b>N1 (%)</b>                       | 7.17 (1.31)   | 7.05 (1.28)   | 0.406 (0.06)  |
| <b>N2 (min)</b>                     | 197 (21.10)   | 198 (23.20)   | 0.473 (0.06)  |
| <b>N2 (%)</b>                       | 46.70 (6.07)  | 46.70 (5.85)  | 0.856 (0.01)  |
| <b>N3 (min)</b>                     | 88 (37.80)    | 88.70 (40.40) | 0.747 (0.001) |
| <b>N3 (%)</b>                       | 20.60 (8.27)  | 20.60 (8.88)  | 0.922 (0.02)  |
| <b>SE (%)</b>                       | 88.70 (3.58)  | 89 (3.23)     | 0.197 (0.03)  |
| <b>SOL (min)</b>                    | 15.50 (8.57)  | 15.80 (7.78)  | 0.567 (0.06)  |
| <b>WASO (min)</b>                   | 38.50 (13.80) | 36.40 (12.00) | 0.128 (0.07)  |
| <b>REM Latency (min)</b>            | 97.20 (19.90) | 97 (18.80)    | 0.886 (0.02)  |
| <b>Cortical arousals (events/h)</b> | 7.15 (3.94)   | 7.43 (4.25)   | 0.303 (0.03)  |

HPLC: high-protein, low-carbohydrate; LPHC: low-protein, high carbohydrate; REM: rapid-eye movement; SE: sleep efficiency; SOL: sleep onset latency; TST: total sleep time; WASO: wake after sleep onset
